# Supplementary material
Source: PubMed Central journal article supplement (PMC4061716)
Supplement: NIHMS481940-supplement-1_si_001.pdf [file NIHMS481940-supplement-1_si_001.pdf]

# Supporting Information

## Reactive Functionalized Membranes for Polychlorinated Biphenyl Degradation

Minghui Gui,<sup>†</sup> Lindell E. Ormsbee,<sup>‡</sup> and Dibakar Bhattacharyya<sup>\*,†</sup>

<sup>†</sup> Department of Chemical and Materials Engineering, University of Kentucky, Lexington, KY 40506

<sup>‡</sup> Department of Civil Engineering, University of Kentucky, Lexington, KY 40506

Figure S1. Pure water flux of Fe/Pd NP immobilized PVDF-PAA membrane in 2-chlorobiphenyl dechlorination (convective flow).

Figure S2. Batch study of PCB (2-chlorobiphenyl) dechlorination and biphenyl formation by Fe/Pd NPs.

Figure S3. Mass spectrum (Selected ion: 227) and chromatograph of tentatively identified 3, 4-hydroxybiphenyl (derivatized).

Figure S4. 2,2'-Dihydroxybiphenyl (derivatized) detected in biphenyl oxidation.

Figure S5. Benzoic acid (derivatized) detected in biphenyl oxidation.

Figure S6. Tentatively identified trihydroxybiphenyl (derivatized) detected in biphenyl oxidation.

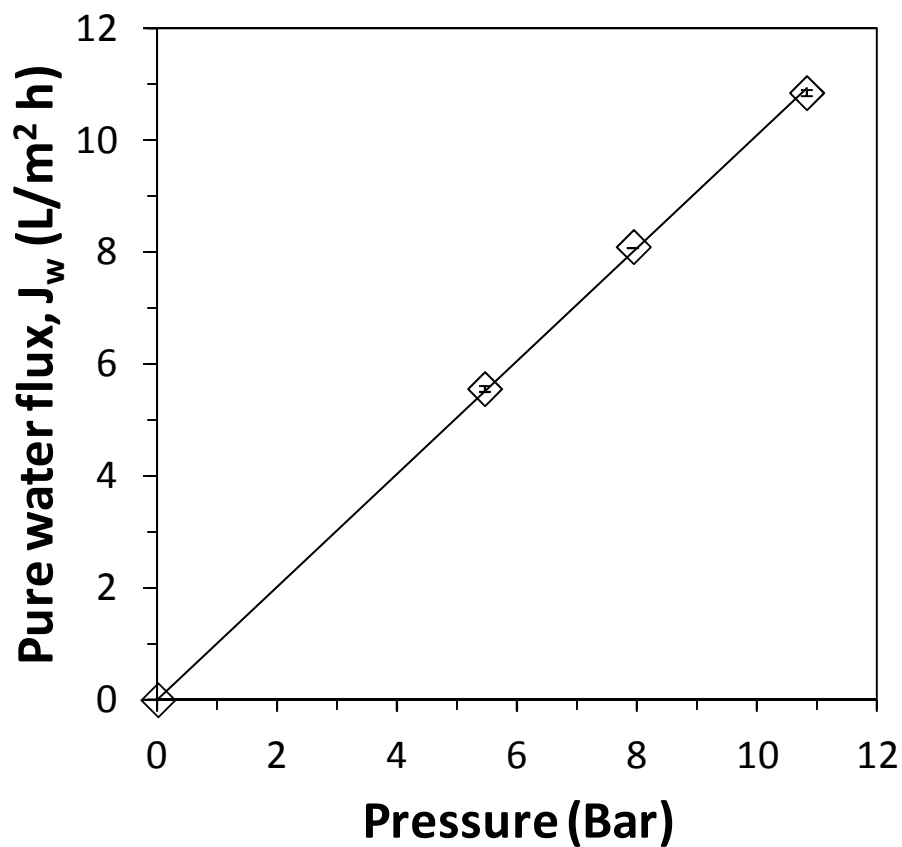

**Figure S1.** Pure water flux of Fe/Pd NP immobilized PVDF-PAA membranes in 2-chlorobiphenyl dechlorination (convective flow).  $[\text{PCB}]_0=31\mu\text{M}$ , mass (Fe)=6.1 mg (size: 80 nm,  $\rho_m=58.5$  g/L),  $[\text{Pd}]=0.9$  wt% as Fe, pH=7.5-8.0. Membrane external area: 13.2 cm<sup>2</sup>.

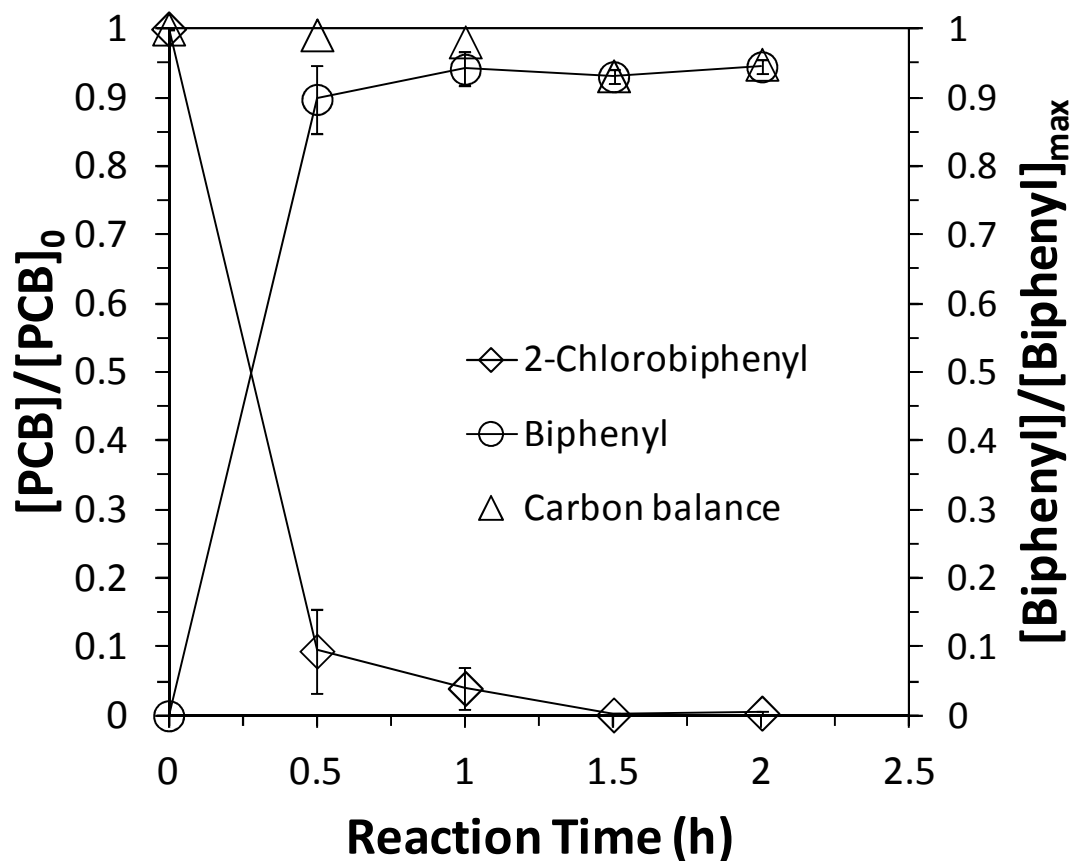

**Figure S2.** Batch study of PCB (2-chlorobiphenyl) dechlorination and biphenyl formation by Fe/Pd NPs.  $[PCB]_0=31\mu M$ ,  $[Fe]=0.5\text{ g/L}$  (BET surface area: $37.8\text{ m}^2/\text{g}$ ),  $[Pd]=0.9\text{ wt\% as Fe}$ ,  $\text{pH}=7.3-7.5$ .

#### Synthesis of Fe/Pd NPs

5 mL of  $\text{NaBH}_4$  (90 mM) was added into 15 mL of  $\text{FeSO}_4$  (12 mM) dropwise. The black iron NPs formed were washed with deoxygenated water twice and separated with a magnet. Pd was coated on Fe surface by adding 20 mL of  $\text{K}_2\text{PdCl}_4$  (153  $\mu\text{M}$ , ethanol:water=9:1 v/v) and shaking the solution for 30 min.

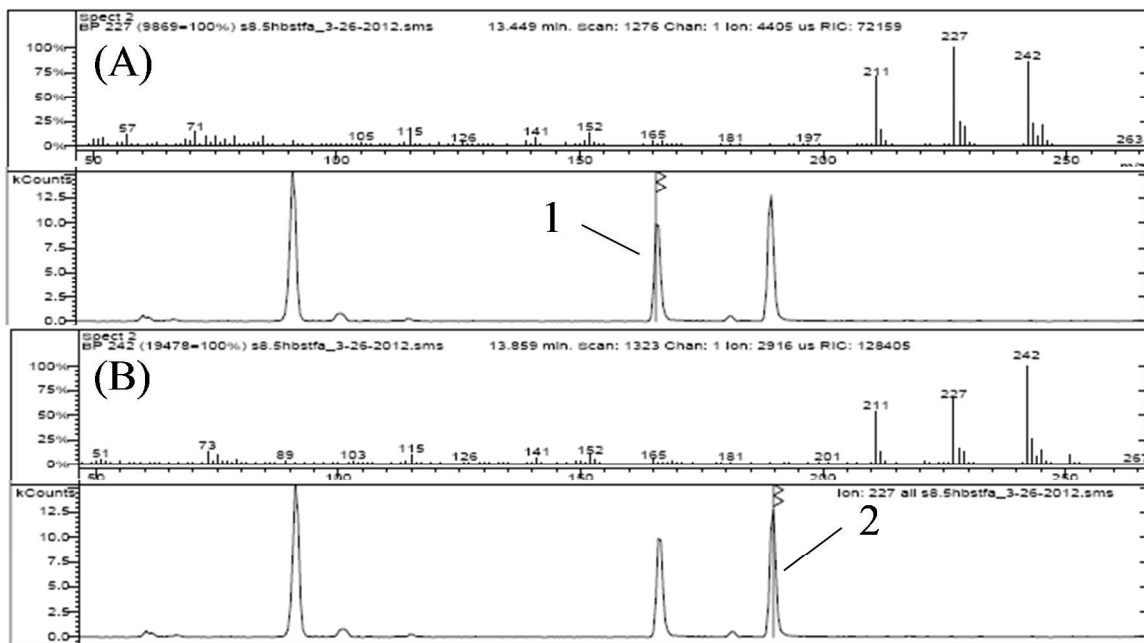

**Figure S3.** Mass spectrum (Selected ion: 227) and chromatograph of tentatively identified (A) 3-hydroxybiphenyl (derivatized, peak 1); (B) 4-hydroxybiphenyl (derivatized, peak 2).

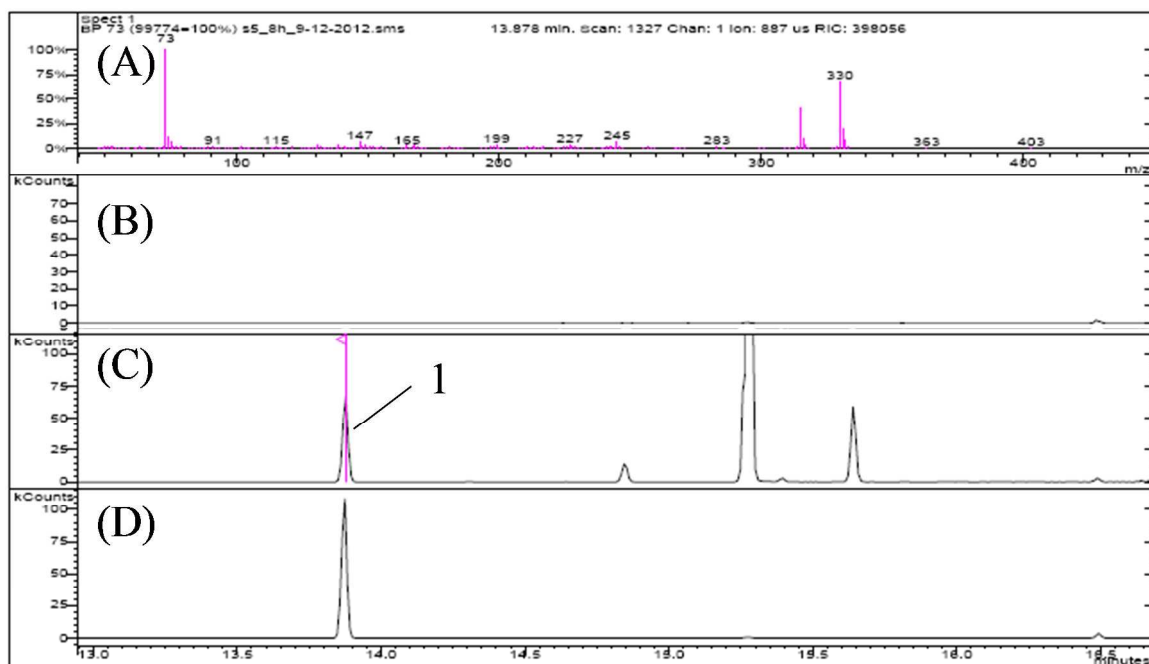

**Figure S4.** 2,2'-Dihydroxybiphenyl (derivatized) detected in biphenyl oxidation by Fe/Pd NP immobilized PAA/PVDF membranes (peak 1). (A) Mass spectrum (Selected ion: 330); (B) Chromatograph of BSTFA/Pyridine; (C) Chromatograph of sample; (D) Chromatograph of 2,2'-dihydroxybiphenyl standard.

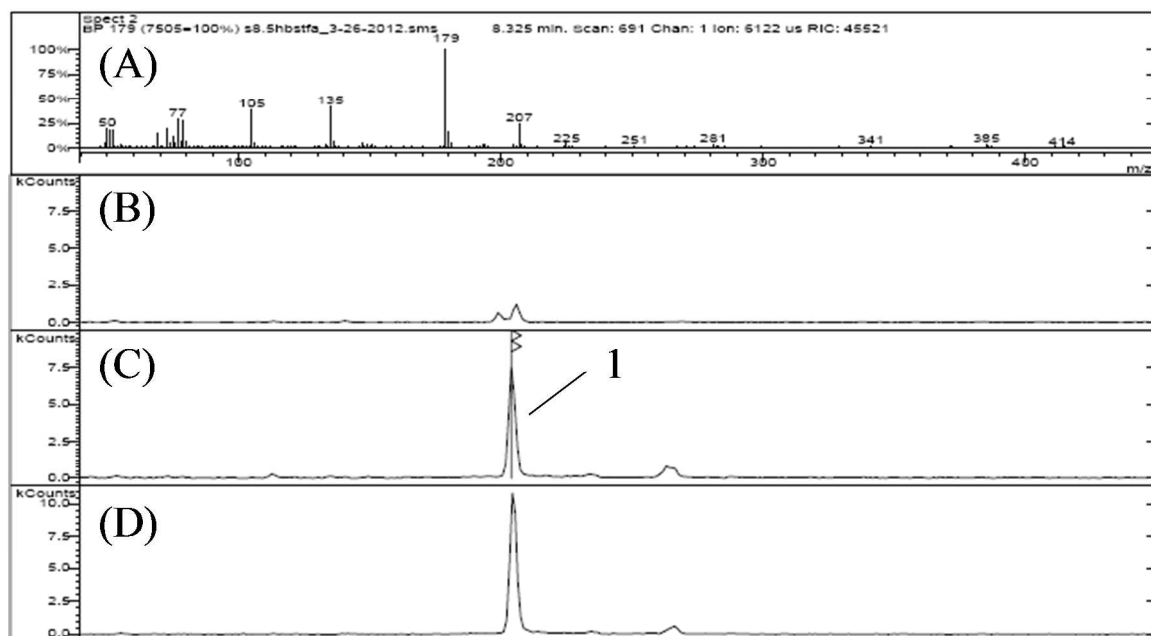

**Figure S5.** Benzoic acid (derivatized) detected in biphenyl oxidation by Fe/Pd NP immobilized PAA/PVDF membranes (peak 1). (A) Mass spectrum (Selected ion: 179); (B) Chromatograph of BSTFA/Pyridine; (C) Chromatograph of sample; (D) Chromatograph of benzoic acid standard.

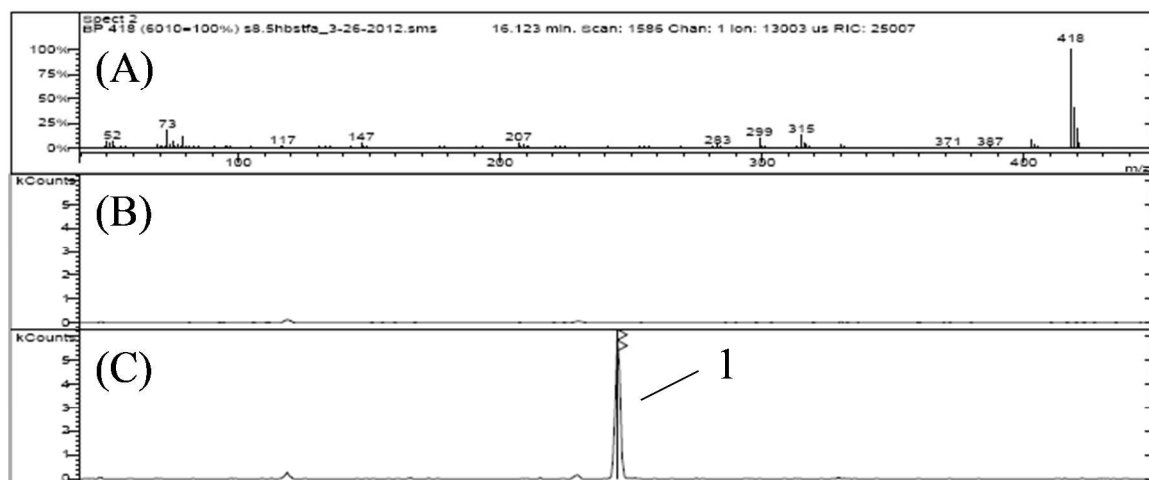

**Figure S6.** Tentatively identified trihydroxybiphenyl (derivatized) detected in biphenyl oxidation by Fe/Pd NP immobilized PAA/PVDF membranes (peak 1). (A) Mass spectrum (Selected ion: 418); (B) Chromatograph of BSTFA/Pyridine; (C) Chromatograph of sample.
